# Supplementary material
Source: Springer Nature journal article supplement (https://www.springermedizin.de/resource/supplementary/12933_2010_292_MOESM2_ESM.pdf/9540030)

**A**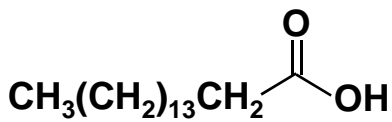

palmitic acid

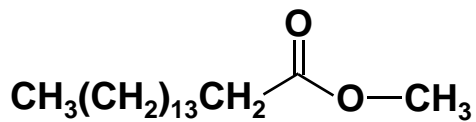

methyl palmitate

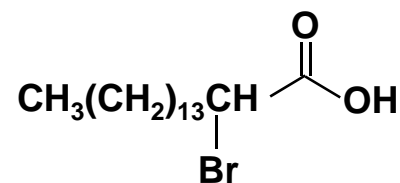

2-bromopalmitic acid

**B**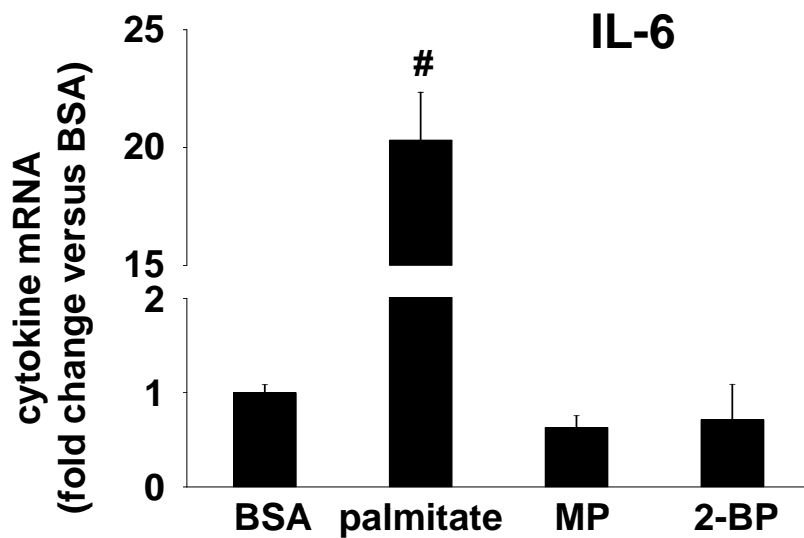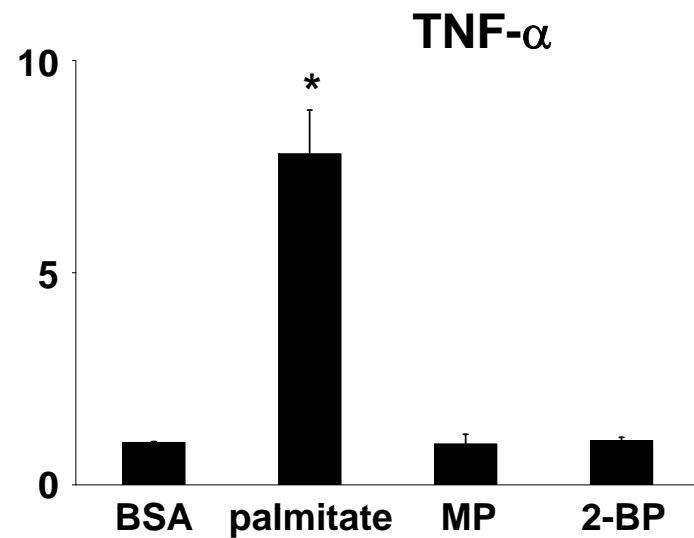**C**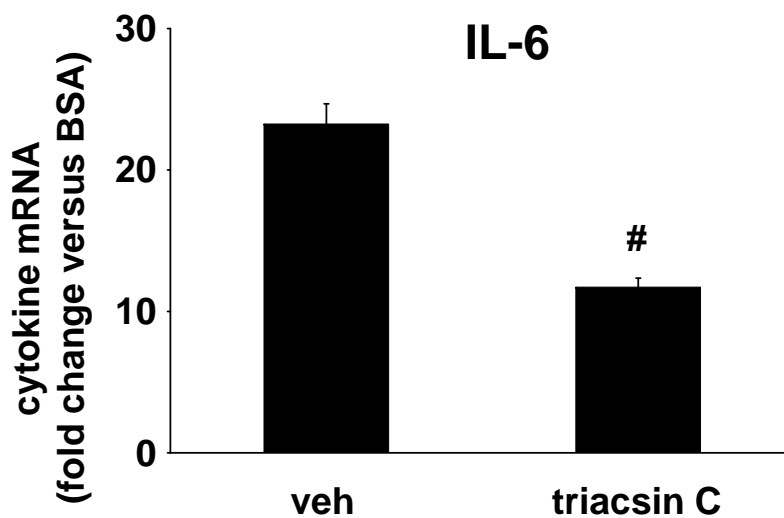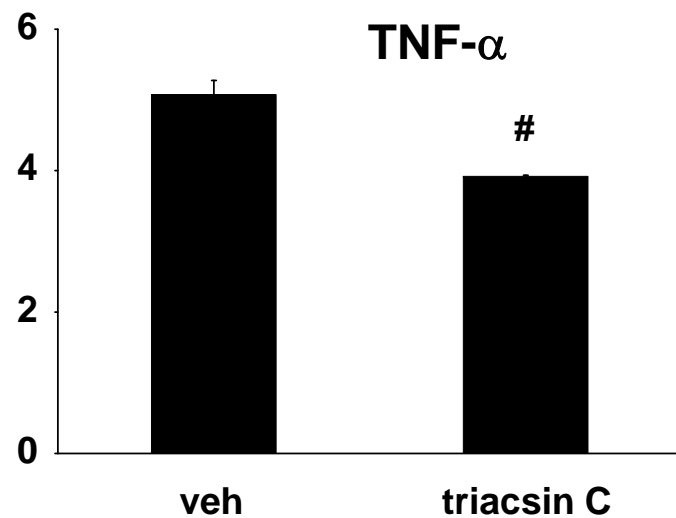

Supplement: MOESM2 [file 9540030]
